# Supplementary material for: Direct and Indirect Effects of Rotavirus Vaccination: Comparing Predictions from Transmission Dynamic Models
Source: PubMed Central journal article supplement (PMC3418263; doi:10.1371/journal.pone.0042320), 2012-08-13

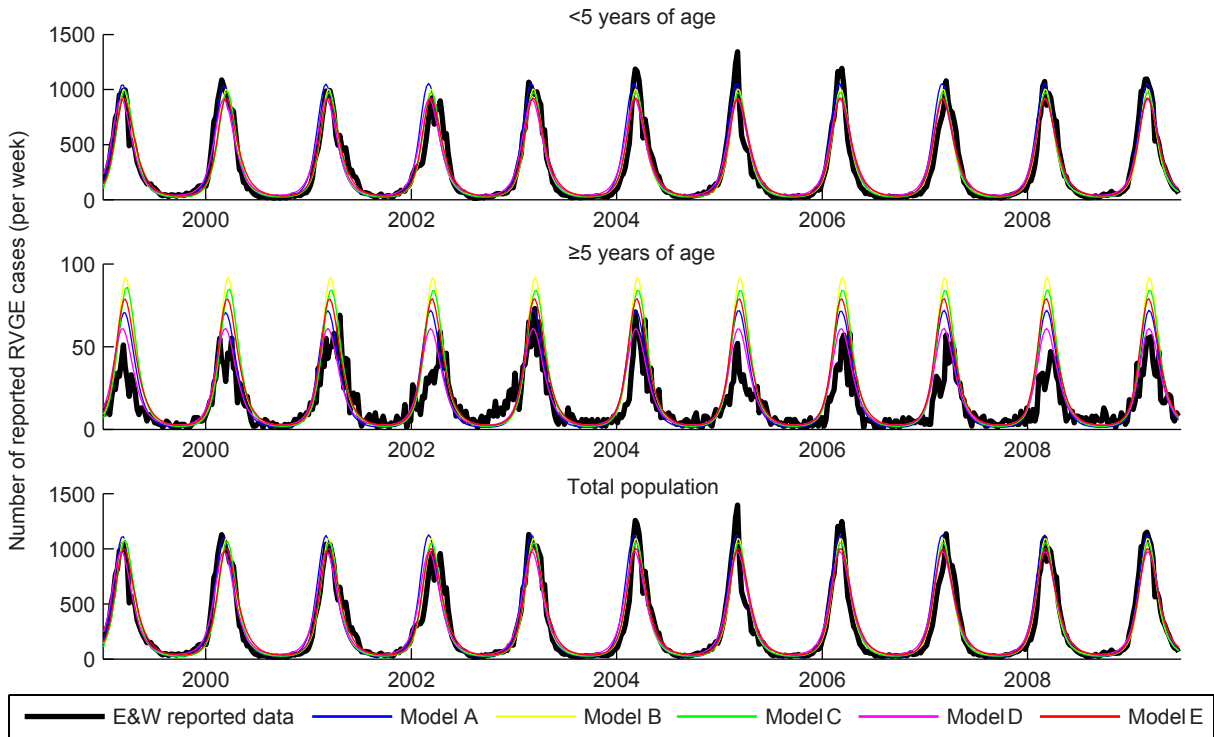

Supplement: pone.0042320.s002.pdf [file pone.0042320.s002.pdf]
