# Supplementary material for: Direct and Indirect Effects of Rotavirus Vaccination: Comparing Predictions from Transmission Dynamic Models
Source: PubMed Central journal article supplement (PMC3418263; doi:10.1371/journal.pone.0042320), 2012-08-13
Supplement: pone.0042320.s003.pdf [file pone.0042320.s003.pdf]

**A***(i)* <5 year olds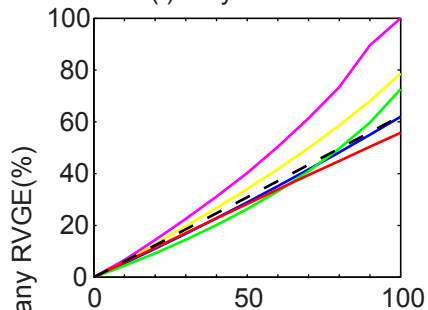*(ii)*  $\geq 5$  year olds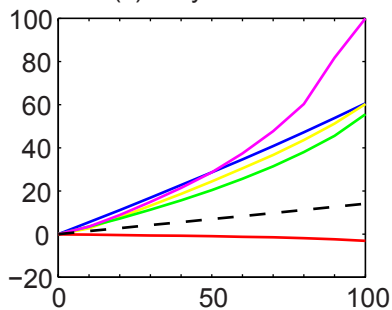*(iii)* Total population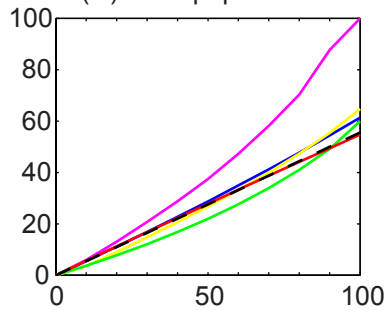**B**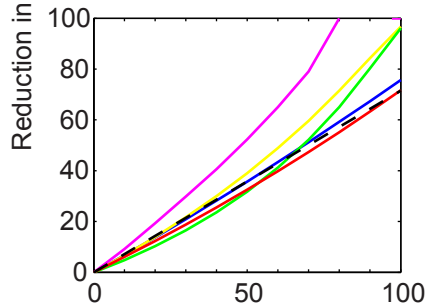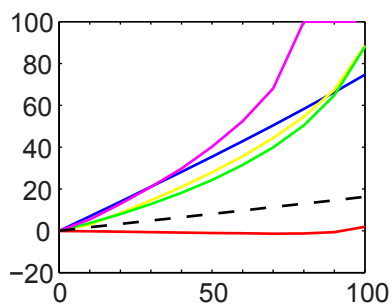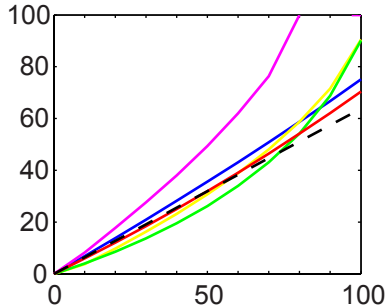

Coverage (%)

— Model A — Model B — Model C — Model D — Model E - - - Direct effect
