# Supplementary material for: Direct and Indirect Effects of Rotavirus Vaccination: Comparing Predictions from Transmission Dynamic Models
Source: PubMed Central journal article supplement (PMC3418263; doi:10.1371/journal.pone.0042320), 2012-08-13
Supplement: pone.0042320.s004.pdf [file pone.0042320.s004.pdf]

**Table S1. Fixed parameter values for five models, for both the original publication and the current analysis.**

| <b>Model [ref*]</b>                                                | <b>Model A [18,19]</b>                  |                                       | <b>Model B [20]</b> |                | <b>Model C [21]</b>                      |                | <b>Model D [21]</b>       |                | <b>Model E [23]</b>                                         |                |
|--------------------------------------------------------------------|-----------------------------------------|---------------------------------------|---------------------|----------------|------------------------------------------|----------------|---------------------------|----------------|-------------------------------------------------------------|----------------|
| <b>Parameter [ref]</b>                                             | <b>Original</b>                         | <b>Current</b>                        | <b>Original</b>     | <b>Current</b> | <b>Original</b>                          | <b>Current</b> | <b>Original</b>           | <b>Current</b> | <b>Original</b>                                             | <b>Current</b> |
| Duration of maternal immunity [5]                                  | NA                                      | 13 weeks                              | 3 months            | 13 weeks       | 90 days                                  | 13 weeks       | 40 days                   | 13 weeks       | 90 days                                                     | 13 weeks       |
| Duration of incubation period [3]                                  | NA                                      | NA                                    | NA                  | NA             | 1 day                                    | 1 day          | NA                        | NA             | NA                                                          | NA             |
| <b>Duration of infectiousness</b>                                  |                                         |                                       |                     |                |                                          |                |                           |                |                                                             |                |
| <i>First infection</i> [10,11]                                     | 5 days (severe)                         | 7 days (severe)                       | 7 days              | 7 days         | 8 days                                   | 7 days         | 10 days                   | 7 days         | 8 days                                                      | 7 days         |
| <i>Subsequent infections</i> [8,9]                                 | 3 days (mild)                           | 3.5 days (mild)                       | 3.5 days            | 3.5 days       | 6 days for second, 4 days for subsequent | 3.5 days       | 10 days                   | 3.5 days       | 8 days                                                      | 7 days         |
| <b>Relative risk of infection following: [7]</b>                   |                                         |                                       |                     |                |                                          |                |                           |                |                                                             |                |
| <i>First infection</i>                                             | NA                                      | NA                                    | 0.62                | 0.62           | 0.62                                     | 0.62           | 0.62                      | 0.62           | 0.62                                                        | 0.62           |
| <i>Second infection</i>                                            |                                         |                                       | 0.35                | 0.37           | 0.375                                    | 0.37           | 0.40                      | 0.37           | 0.40                                                        | 0.37           |
| <i>Third infection</i>                                             |                                         |                                       | 0.35                | 0.37           | 0.375                                    | 0.37           | 0.34                      | 0.37           | 0.37                                                        | 0.37           |
| <b>Proportion of infections with any RVGE (severe RVGE) [7]</b>    |                                         |                                       |                     |                |                                          |                |                           |                |                                                             |                |
| <i>First infection</i>                                             | 0.76 mild, 0.24 severe for <5 yr olds   | 0.76 mild, 0.24 severe for <5 yr olds | NA (0.11)           | 0.47 (0.13)    | 0.47 (0.13)                              | 0.47 (0.13)    | 0.39 (0.11)               | 0.47 (0.13)    | 0.47                                                        | 0.47 (0.13)    |
| <i>Second infection</i>                                            |                                         |                                       | NA (0.029)          | 0.25 (0.03)    | 0.25 (0.03)                              | 0.25 (0.03)    | 0.14 (0.03)               | 0.25 (0.03)    | 0.25                                                        | 0.25 (0.03)    |
| <i>Third infection</i>                                             | 1 mild, 0 severe for ≥5 yr olds         | Estimated for ≥5 yr olds              | NA (0)              | 0.20 (0)       | 0.20 (0)                                 | 0.20 (0)       | 0.17 (0)                  | 0.32 (0)       | 0.32                                                        | 0.32 (0)       |
| <i>Fourth infection</i>                                            |                                         |                                       | NA                  | NA             | NA                                       | NA             | 0.09 (0)                  | 0.20 (0)       | 0.20                                                        | 0.20 (0)       |
| <b>Relative infectiousness (compared to first infection) [2,4]</b> |                                         |                                       |                     |                |                                          |                |                           |                |                                                             |                |
| <i>Second infection</i>                                            | 0.5 (mild vs severe)                    |                                       | 0.5                 | 0.5            | 0.5                                      | 0.5            | Values between 1 and 0.25 | 0.5            | Only individuals with symptomatic RVGE transmit (see above) |                |
| <i>Subsequent infections</i>                                       | Asymptomatic infections do not transmit |                                       | 0.1                 | 0.2            | 0.2                                      | 0.2            |                           | 0.2            |                                                             |                |
| Duration of complete immunity [1,6]                                | 5 years                                 | 1 year                                | 9 months to 1 year  | 1 year         | 2 months                                 | 1 year         | NA                        | NA             | NA                                                          | NA             |
| Type of cases reported                                             | Severe RVGE                             |                                       | Severe RVGE         |                | Severe RVGE                              |                | Any RVGE                  |                | Any RVGE                                                    |                |

\*ref=reference; numbers correspond to references in the Supporting Text.
